# Supplementary material for: Production of aromatic hydrocarbons from lignin derivatives by catalytic cracking over a SiO2–Al2O3 catalyst
Source: Royal Society of Chemistry journal article supplement (doi:10.1039/d3ra00990d), 2023-01-01
Supplement: d3ra00990d1.pdf [file d3ra00990d1.pdf]

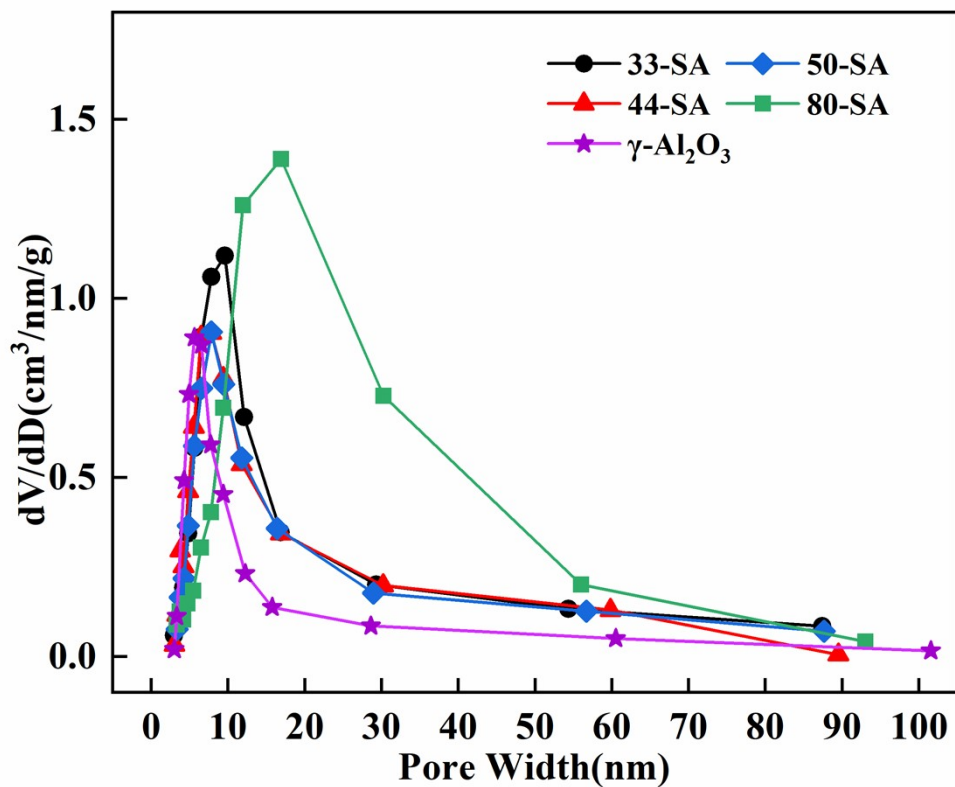

1  
2  
3

Fig. S1 Pore size distribution of spent catalysts

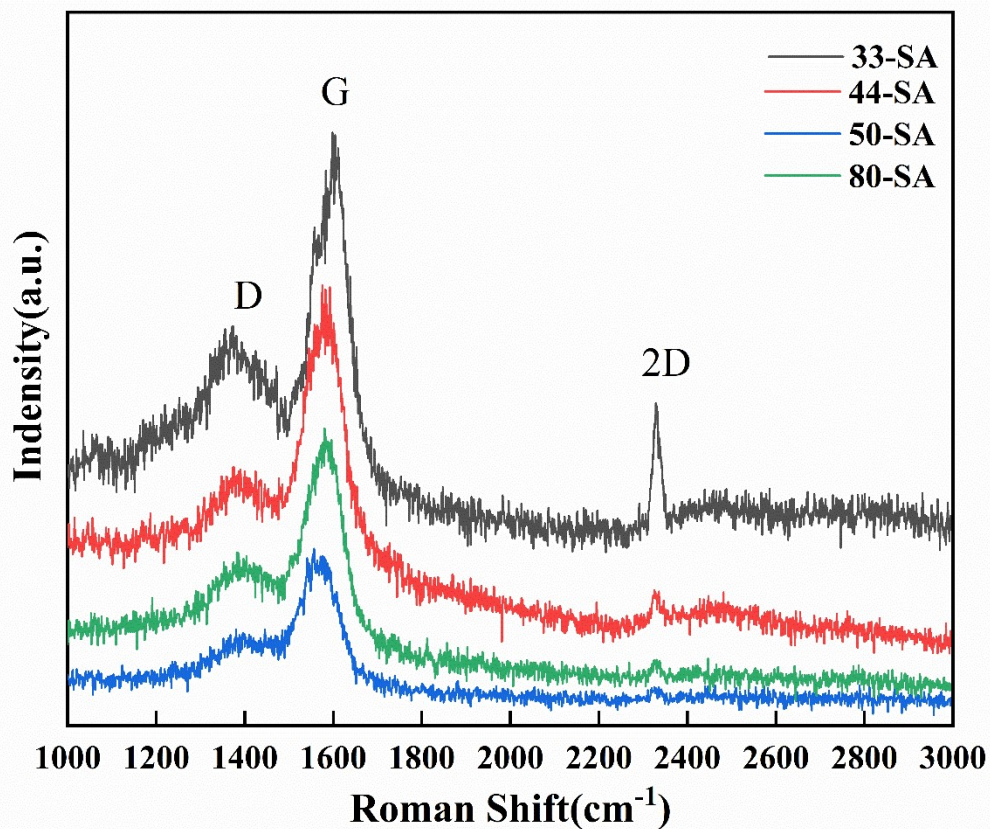

4  
5

Fig.S2 Raman spectrum of spent catalysts

6

7 Table. S1 Summary of the peaks and bands assignment.

| Band name        | Band position $\text{cm}^{-1}$ | Description                                                                    |
|------------------|--------------------------------|--------------------------------------------------------------------------------|
| $V_{\text{C-H}}$ | 1250–1270                      | C–H vibrations                                                                 |
| D1               | 1360                           | “Breathing” vibrational mode of not-well-structured aromatics                  |
| D3               | 1450                           | Structural defects of aromatic clusters                                        |
| G1               | 1575–1600                      | Assigned to in-plane stretching vibrational modes of well-structured aromatics |
| D2               | 1610                           | Attributed to disordered aromatic structures                                   |

8

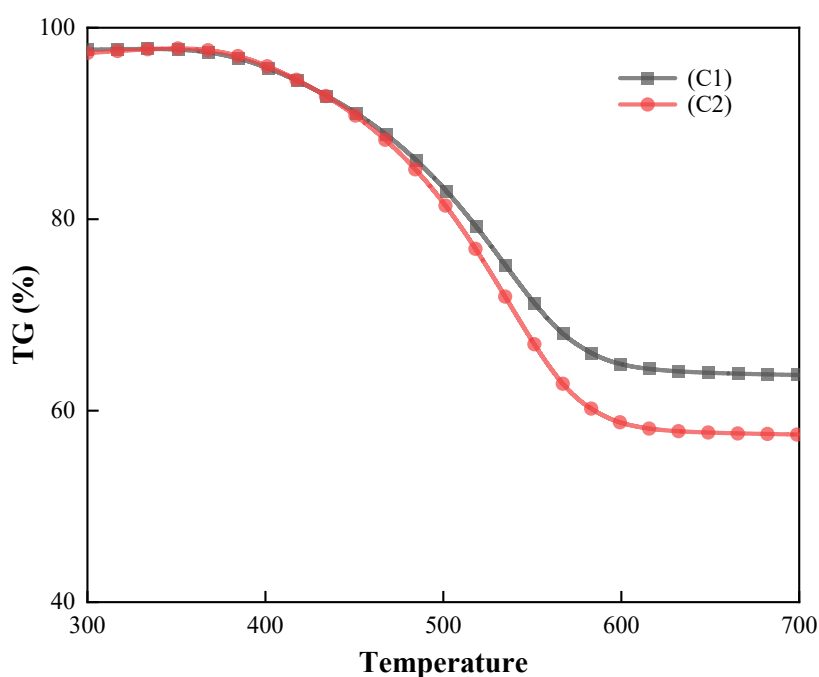

9

Fig. S3 Catalyst TG curve in continuous use

10

11 Table.S2. Cyclability of catalysts

| Cycle number | PMB and HMB Yield (%) |
|--------------|-----------------------|
| 1            | 48.31%                |
| 2            | 13.64%                |

12
